# Supplementary material
Source: MDPI journal article supplement (https://www.mdpi.com/1424-8247/16/9/1311)
Supplement: s1 [file s1]

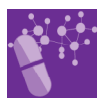

# Process Optimization for the Bioinspired Synthesis of Gold Nanoparticles Using *Cordyceps militaris*, Its Characterization, and Assessment of Enhanced Therapeutic Efficacy

Girish Gawas <sup>1</sup>, Muniappan Ayyanar <sup>2</sup>, Nilambari Gurav <sup>3</sup>, Dinesh Hase <sup>4</sup>, Vaishali Murade <sup>5</sup>, Sameer Nadaf <sup>6</sup>, Mohd Shahnawaz Khan <sup>7</sup>, Rupesh Chikhale <sup>8</sup>, Mohan Kalaskar <sup>9</sup> and Shailendra Gurav <sup>1,\*</sup>

<sup>1</sup> Department of Pharmacognosy, Goa College of Pharmacy, Goa University, Panaji 403001, India; girishgawas95@gmail.com

<sup>2</sup> Department of Botany, A.V.V.M. Sri Pushpam College (Autonomous), Affiliated to Bharathidasan University, Poondi 613503, India; asmayyanar@yahoo.com

<sup>3</sup> PES's Rajaram and Tarabai Bandekar College of Pharmacy, Goa University, Ponda 403401, India; nilagurav@rediffmail.com

<sup>4</sup> Department of Pharmacognosy, Amrutwahini College of Pharmacy, Sangamner 422608, India; dinesh23787@gmail.com

<sup>5</sup> Department of Chemistry and Research Centre, Padmashri Vikhe Patil College Pravaranagar, Loni 445001, India; vaishali.hase66@gmail.com

<sup>6</sup> Bharati Vidyapeeth College of Pharmacy, Palus 416310, India; sam.nadaf@rediffmail.com

<sup>7</sup> Department of Biochemistry, College of Science, King Saud University, Riyadh 11451, Saudi Arabia; moskhan@ksu.edu.sa

<sup>8</sup> UCL School of Pharmacy, 29–39 Brunswick Square, London WC1N 1AX, UK; r.chikhale@ucl.ac.uk

<sup>9</sup> R. C. Patel Institute of Pharmaceutical Education and Research, Shirpur 425405, India; kalaskar.mohan@gmail.com

\* Correspondence: shailendra.gurav@nic.in; Tel.: +91-99-7083-5019

**Abstract:** The promising therapeutic implications of nanoparticles have spurred their development for biomedical applications. An eco-friendly methodology synthesizes gold nanoparticles using *Cordyceps militaris*, an edible mushroom (*Cord*-Au-NPs), using a quality-by-design approach (central composite design). UV-visible spectroscopy analysis revealed an absorption peak in the 540–550 nm, thus confirming the synthesis of gold nanoparticles. *Cord*-Au-NPs have a crystalline structure, as evidenced by the diffraction peaks. The zeta potential value of -19.42 mV signifies the stability of *Cord*-Au-NPs. XRD study shows gold facets and EDX analysis revealed a strong peak of spherical nanoparticles in the gold region with a mean particle size of 7.18 nm and a polydispersity index of 0.096. The obtained peaks are closely associated with phenolic groups, lipids, and proteins, as examined by FTIR, suggesting that they function as the reducing agent. *Cord*-Au-NPs exhibited dose-dependent antioxidant, antidiabetic, and antibacterial activity. The method is eco-friendly, non-toxic, less time-consuming, and does not use synthetic materials, leading to higher capabilities in biomedical applications.

**Keywords:** green synthesis; central composite design; antioxidant activity; antidiabetic activity; process optimization

## Supplementary File

### 2.4 Physicochemical characterization

#### 2.4.1 UV- Visible Spectroscopy

The synthesis of *Cord*-Au-NPs was confirmed by taking an absorption spectrum of the reaction mixture in the scanning wavelength range of 200 to 800nm using a UV-visible spectrophotometer (Shimadzu, UV-2700).

#### 2.4.2 Fourier Transform Infrared (FT-IR) Spectroscopy

Fourier Transform Infrared spectrophotometer (Make: Shimadzu, IR Affinity-1) was used to distinguish the bioreduction compounds involved in synthesizing *Cord*-Au-NPs. The spectrum was obtained using the KBr pellet method in the scanning range of 400 to 4000cm<sup>-1</sup>.

#### 2.4.3 X-ray Diffraction Study (XRD)

The synthesized *Cord*-Au-NPs were analyzed to examine the structure and composition using an X-ray diffractometer (XRD) (Rigaku, Ultima IV) at an angular range of 10°<2θ>80° at 40kV and 20mA having a 10mm divergence slit in 2θ/θ continuous scanning mode.

#### 2.4.4 Scanning Electron Microscopy (SEM) and Energy Dispersive X-ray (EDX) Analysis

The microstructure and elemental composition of the *Cord*-Au-NPs were analyzed using SEM with EDX analysis (Carl ZEISS EVO 18). Magnification ranges of 1μm, 2μm, and 200nm were used to observe and visualize the *Cor*-ZnONPs morphology during SEM.

#### 2.4.5 High-Resolution Transmission Electron Microscopy (HRTEM) and Selected Area Electron Diffraction (SAED)

HRTEM analysis and SAED studies of the *Cord*-Au-NPs were carried out using Transmission Electron Microscope (Make: Joel, Model: JEM 2100) to determine the morphology of the *Cor*-ZnONPs.

#### 2.4.6 Particle Size Analysis (PSA) and Zeta Potential Analysis

The average particle size, polydispersity index, mobility and stability profile of *Cor*-ZnONPs were ascertained by performing PSA using Nanophox, NX0088 (Sympatec, Germany).

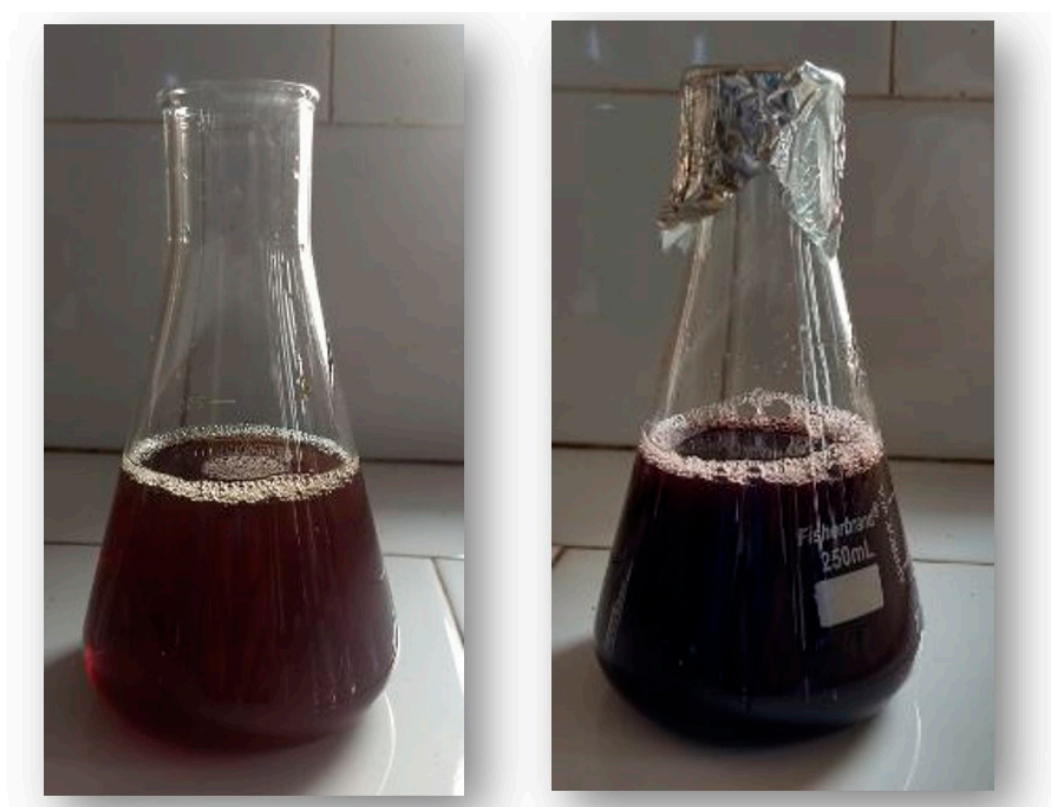

**Fig. S1.** Green synthesis of gold nanoparticles (a) initial color (b) color change after 1 h of incubation

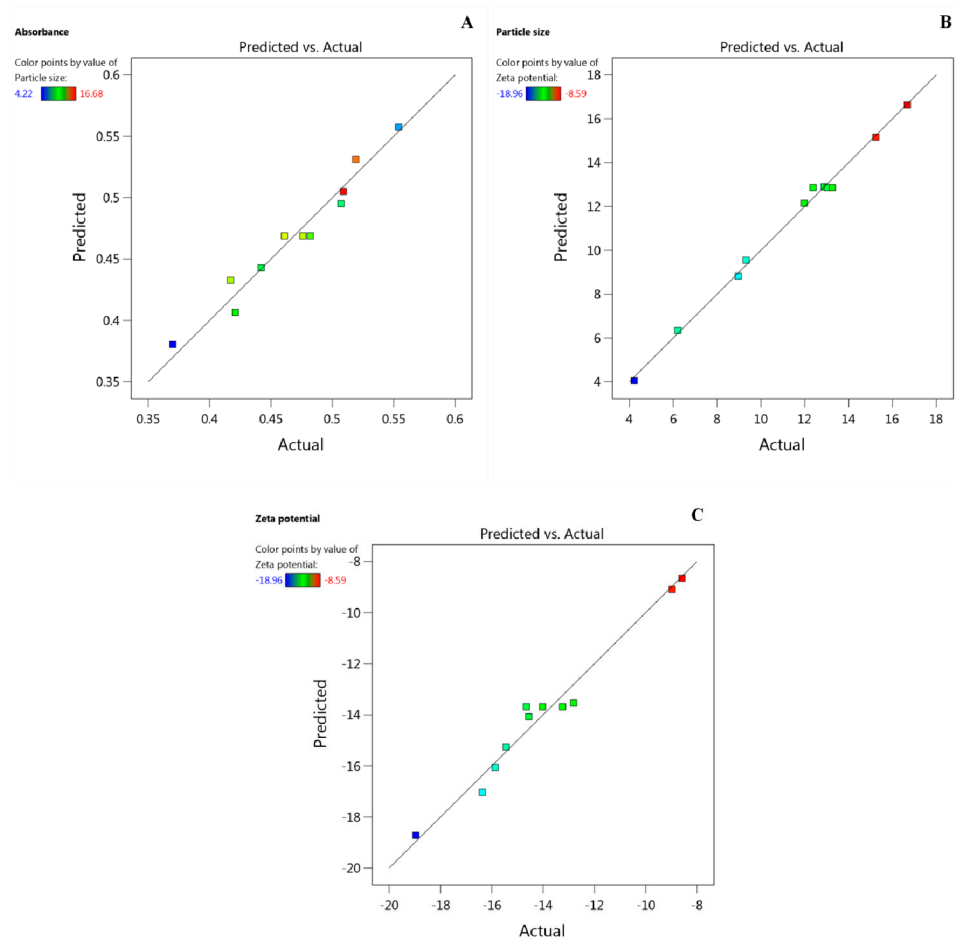

Fig. S2: Actual vs predicted plot for responses A)  $Y_1$ , B)  $Y_2$  and C)  $Y_3$ 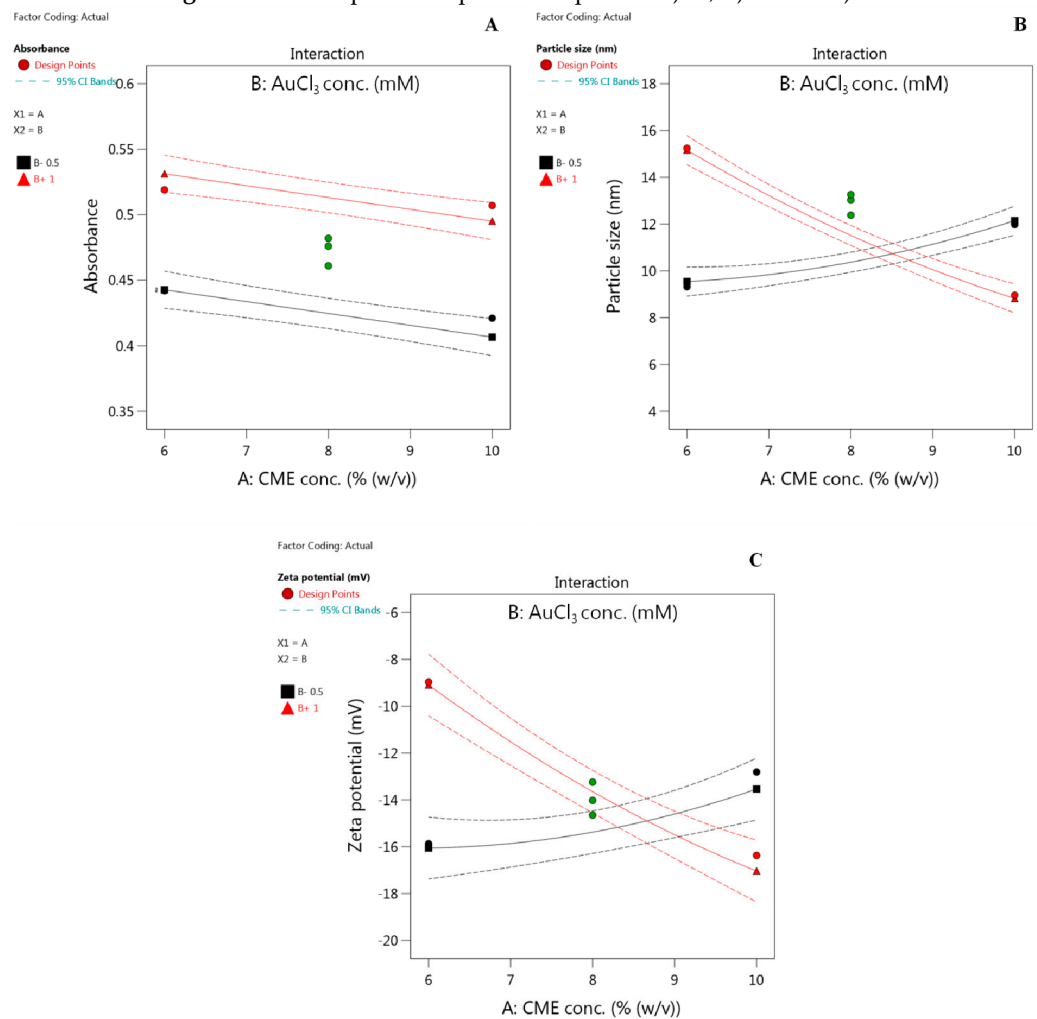Fig. S3: Interaction plot for responses A)  $Y_1$ , B)  $Y_2$  and C)  $Y_3$

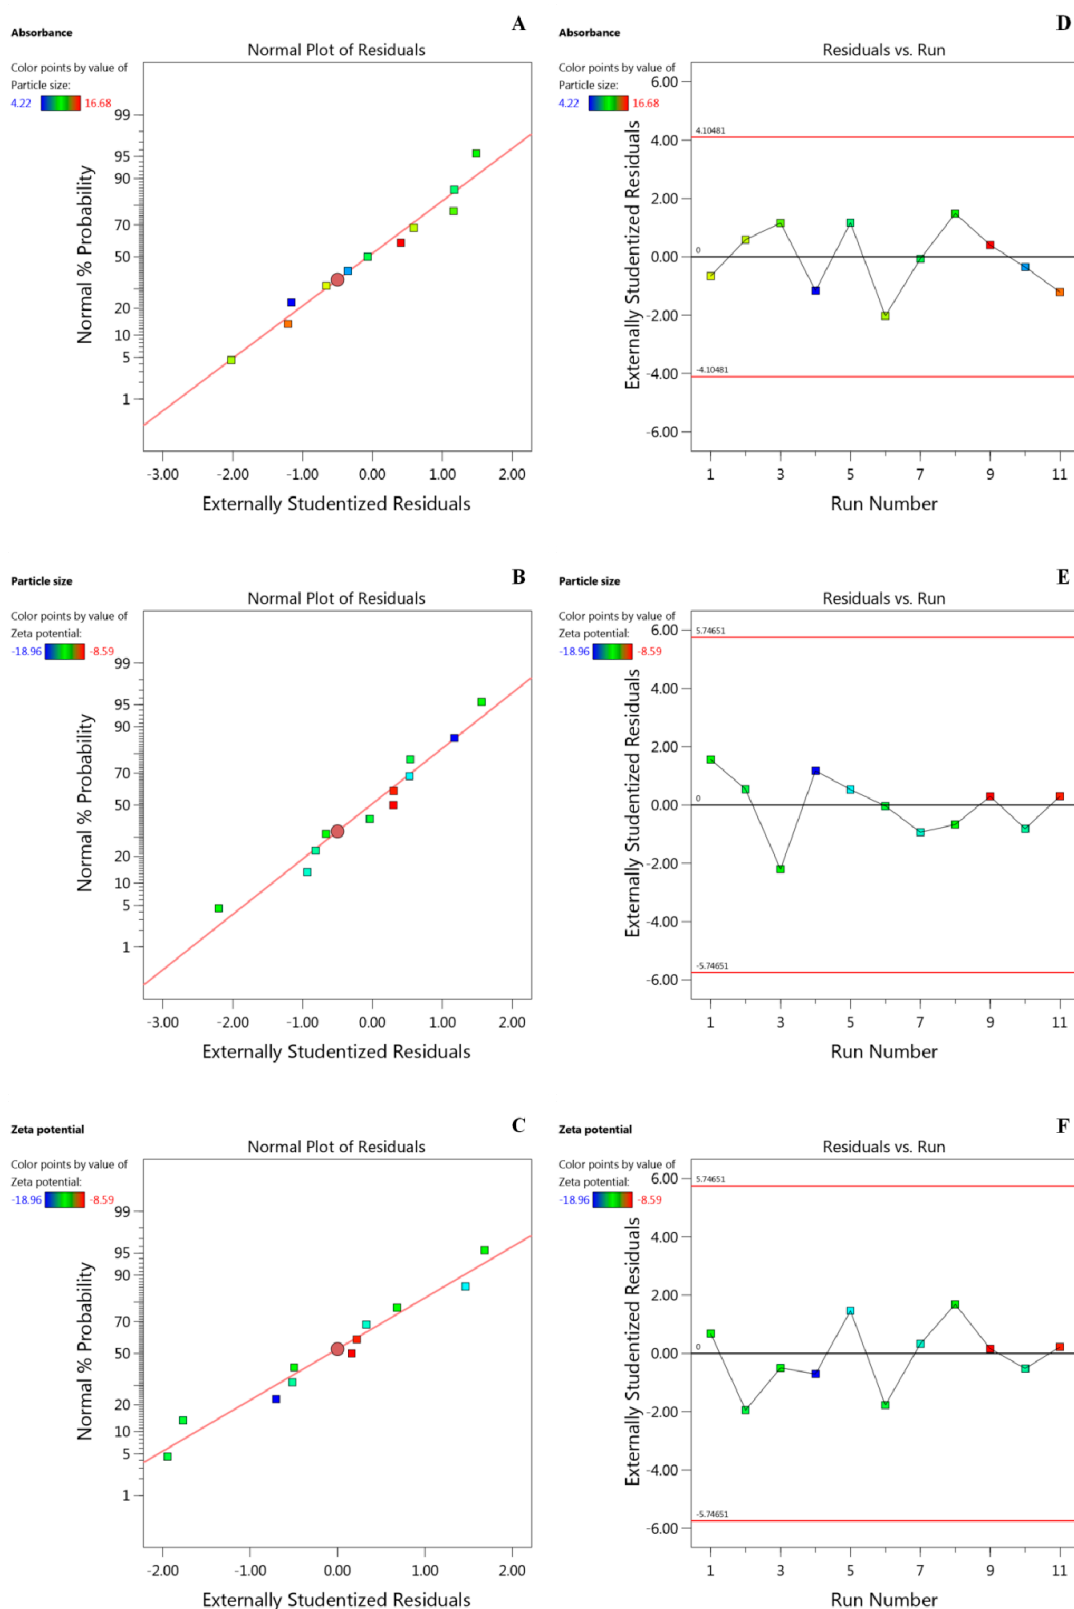

**Fig. S4:** Normal plots of residuals (A–C) and residual *vs* run plots (D–F) for responses Y<sub>1</sub> (A and D), Y<sub>2</sub> (B and E) and Y<sub>3</sub> (C and F)

Factor Coding: Actual

**Overlay Plot**Absorbance  
Particle size  
Zeta potential

● Design Points

X1 = A

X2 = B

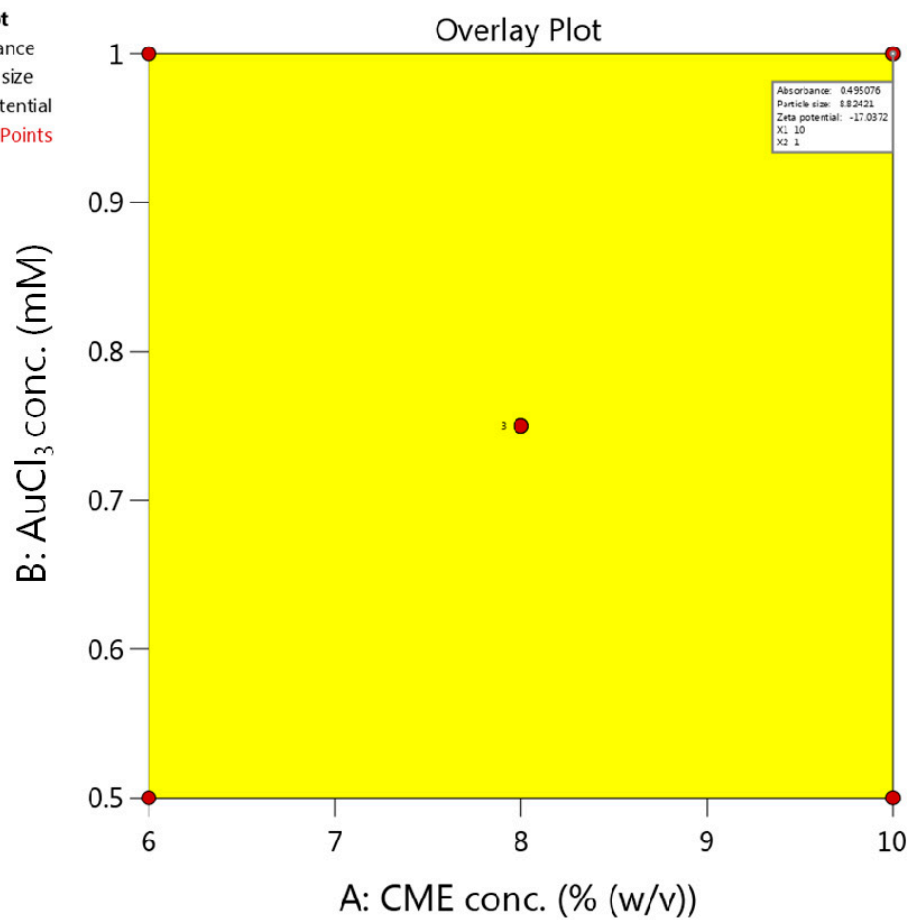

Fig. S5: Overlay contour plot

**Table S1.** MICs of CME and *Cord*-Au-NPs against the studied bacterial strains

| Name of the organisms                    | MIC (µg/mL) |        |                     |
|------------------------------------------|-------------|--------|---------------------|
|                                          | Ampicillin  | CME    | <i>Cord</i> -Au-NPs |
| <i>Proteus vulgaris</i> MTCC 426         | 15.00       | 46.88  | 23.44               |
| <i>Staphylococcus epidermis</i> MTCC 435 | 7.50        | 187.50 | 93.75               |
| <i>Bacillus subtilis</i> MTCC 441        | 15.00       | 187.50 | 23.44               |
| <i>Rhodococcus equi</i> MTCC 2558        | 15.00       | 93.75  | 46.88               |
| <i>Shigella flexneri</i> MTCC 1457       | 30.00       | 187.50 | 93.75               |
| <i>Pseudomonas aeruginosa</i> MTCC 1748  | 7.50        | 93.75  | 46.88               |

**Table S2:** Brine shrimp lethality results of *Cor*-Au-NPs

| Test drug                                     | LC <sub>50</sub> (µg/mL) |
|-----------------------------------------------|--------------------------|
| <i>Cor</i> -Au-NPs                            | 192.23± 57.34            |
| KCrO <sub>7</sub> solution (positive control) | <10 µg/mL                |
| Seawater (negative control)                   | No death was observed    |
